# Supplementary material
Source: PubMed Central journal article supplement (PMC5966039)
Supplement: NIHMS958067-supplement-1.pdf [file NIHMS958067-supplement-1.pdf]

**Figure S1. Related to Figure 1.**

**Genomic Features of Gastrointestinal Adenocarcinomas.**

**(A)** Unsupervised DNA methylation clustering of GIAC and non-GIAC adenocarcinomas. Tissues of origin and corresponding tumor designations: Breast, BRCA; Prostate, PRAD; Ovarian, OV; Cervix, CEAD; Endometrial, UCEC; Esophageal, EAC; Gastric, GAC; Colon, COAD; Rectal, READ; Bile duct, CHOL; Pancreas, PAAD; Lung, LUAD. **(B)** Unsupervised mRNA expression clustering of GIAC and non-GIAC. **(C)** Unsupervised RPPA clustering of GIAC and non-GIAC. **(D)** Mutation frequency of the significantly-mutated genes in upper GIAC (vertical axis) plotted against lower GIAC (horizontal axis), excluding MSI and HM-SNV cases. Genes indicated by green dots are mutated in both the upper and lower GI tract (frequency > 0.02). A subset of those that have not been previously reported by similar large-scale genomic studies are marked by red circles. Other previously unreported genes are marked by blue dots. **(E)** Frequency of significant SCNA in upper GIAC (vertical axis) plotted against lower GIAC (horizontal axis). Genes indicated by green dots are common to upper and lower GI tract (frequency > 0.02). **(G)** Gene expression analysis of GTEx normal tissue showing 553 most differentially expressed genes among GI vs non-GI normal tissue (left panel) and TCGA adenocarcinomas, highlighting elevated expression of select genes in GIAC compared to non-GIAC, after excluding differences related to normal tissue expression (right panel). **(H)** Gene expression-based stemness score indicated by color legend corresponding to select genomic loci amplifications stratified by tissue type. **(F)** Mean arm-level copy-number gain or loss in GIAC (horizontal axis) compared to non-GIAC (vertical axis).





## Figure S2. Related to Figure 2.

### Molecular Subtypes of Gastrointestinal Adenocarcinomas.

**(A)** GIAC samples ranked by mutational density. Horizontal dotted line indicates cutoff of 10 mutations/Mb separating hypermutated (above) from non-hypermutated (below) cancers. **(B)** Two-dimensional scatter plots showing indel vs SNV density (left panel), CDS vs SNV density (middle panel), and CDS vs indel density (right panel) in GIAC tumors, highlighting the separation among molecular subtypes: MSI tumors (blue), HM-SNV (yellow), CIN (purple), GS (blue), and EBV (red). Upper and lower GI tumors are represented by crosses and open circles, respectively. **(C)** Copy-number profiles by chromosomes are shown in the colored heatmap. Degree of amplification or deletion is indicated by intensity of red or blue, respectively. Samples are sorted by CDS as displayed in the left margin, separating CIN (upper) from GS (upper) tumors. **(D)** Contingency table comparing our GIAC molecular subtypes and the CRC molecular subtype assignments (Guinney et al., 2015). **(E)** Differences in leukocyte fraction estimated based on DNA methylation data (left) and M1-Macrophage populations from CIBERSORT adjusted for total leukocytes (right) are shown for the molecular subtypes, stratified by upper vs lower GI tumors. **(F)** Heat map depicting gene expression levels of immunomodulatory mediators in hypermutated tumors divided into MSI and HM-SNV, and further stratified by upper and lower GI tract. **(G)** Box plot indicating gene expression levels of select immunomodulatory mediators in MSI tumors stratified by upper and lower GI tract. Horizontal bars indicate median values, boxes represent interquartile range, and whiskers indicate values within 1.5 times interquartile range. **(H)** Resting NK cell fraction from CIBERSORT adjusted for total leukocytes in indicated molecular subtypes stratified by upper and lower GI tract.

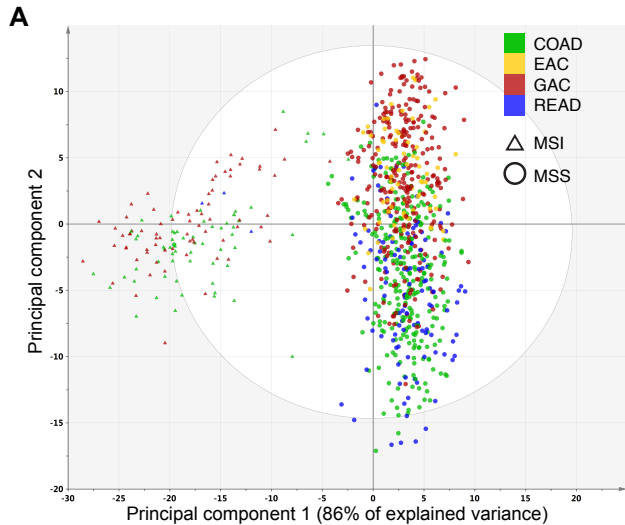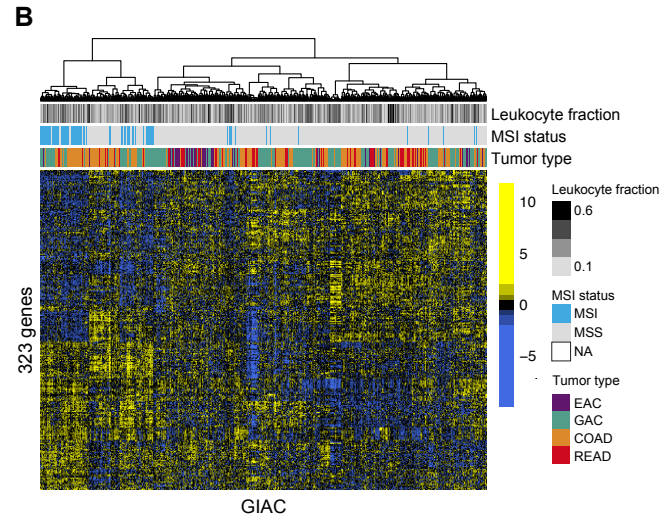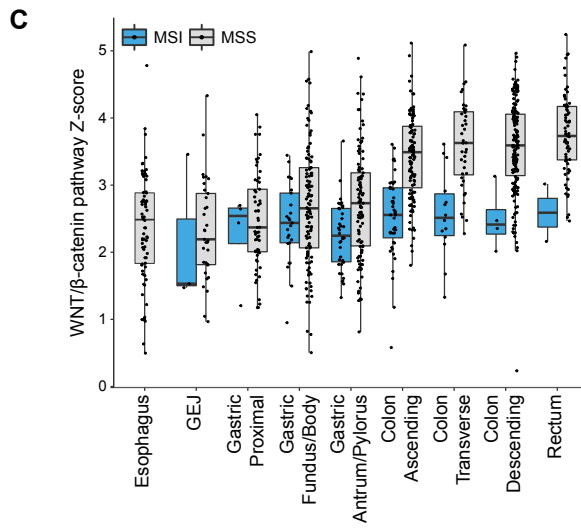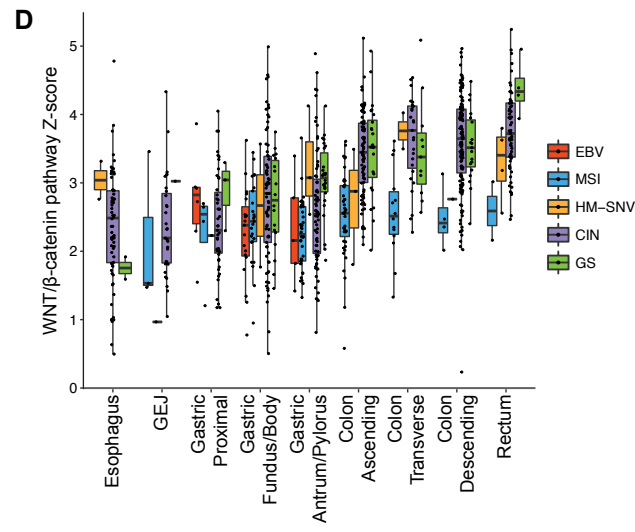

**Figure S3. Related to Figure 3.**

**Analysis of CIMP and MSI Tumors.**

**(A)** Supervised multivariate analysis of GIAC tumors showing MSI subtype as triangles; colors indicate cancer type: colon (green), esophagus (yellow), stomach (red), and rectum (blue). **(B)** heatmap depicting unsupervised mRNA expression analysis of GIAC after removing tissue-specific effects. **(C)** Box plots showing WNT/ $\beta$ -catenin pathway score as measured by single sample Gene Set Enrichment Analysis (ssGSEA) across the GI tract stratified by MSI and non-MSI tumors. Horizontal bars indicate median values, boxes represent interquartile range, and whiskers indicate values within 1.5 times interquartile range. **(D)** WNT/ $\beta$ -catenin pathway score as derived from ssGSEA across the anatomic gradient, stratified by molecular subtype. Horizontal bars indicate median values, boxes represent interquartile range, and whiskers indicate values within 1.5 times interquartile range

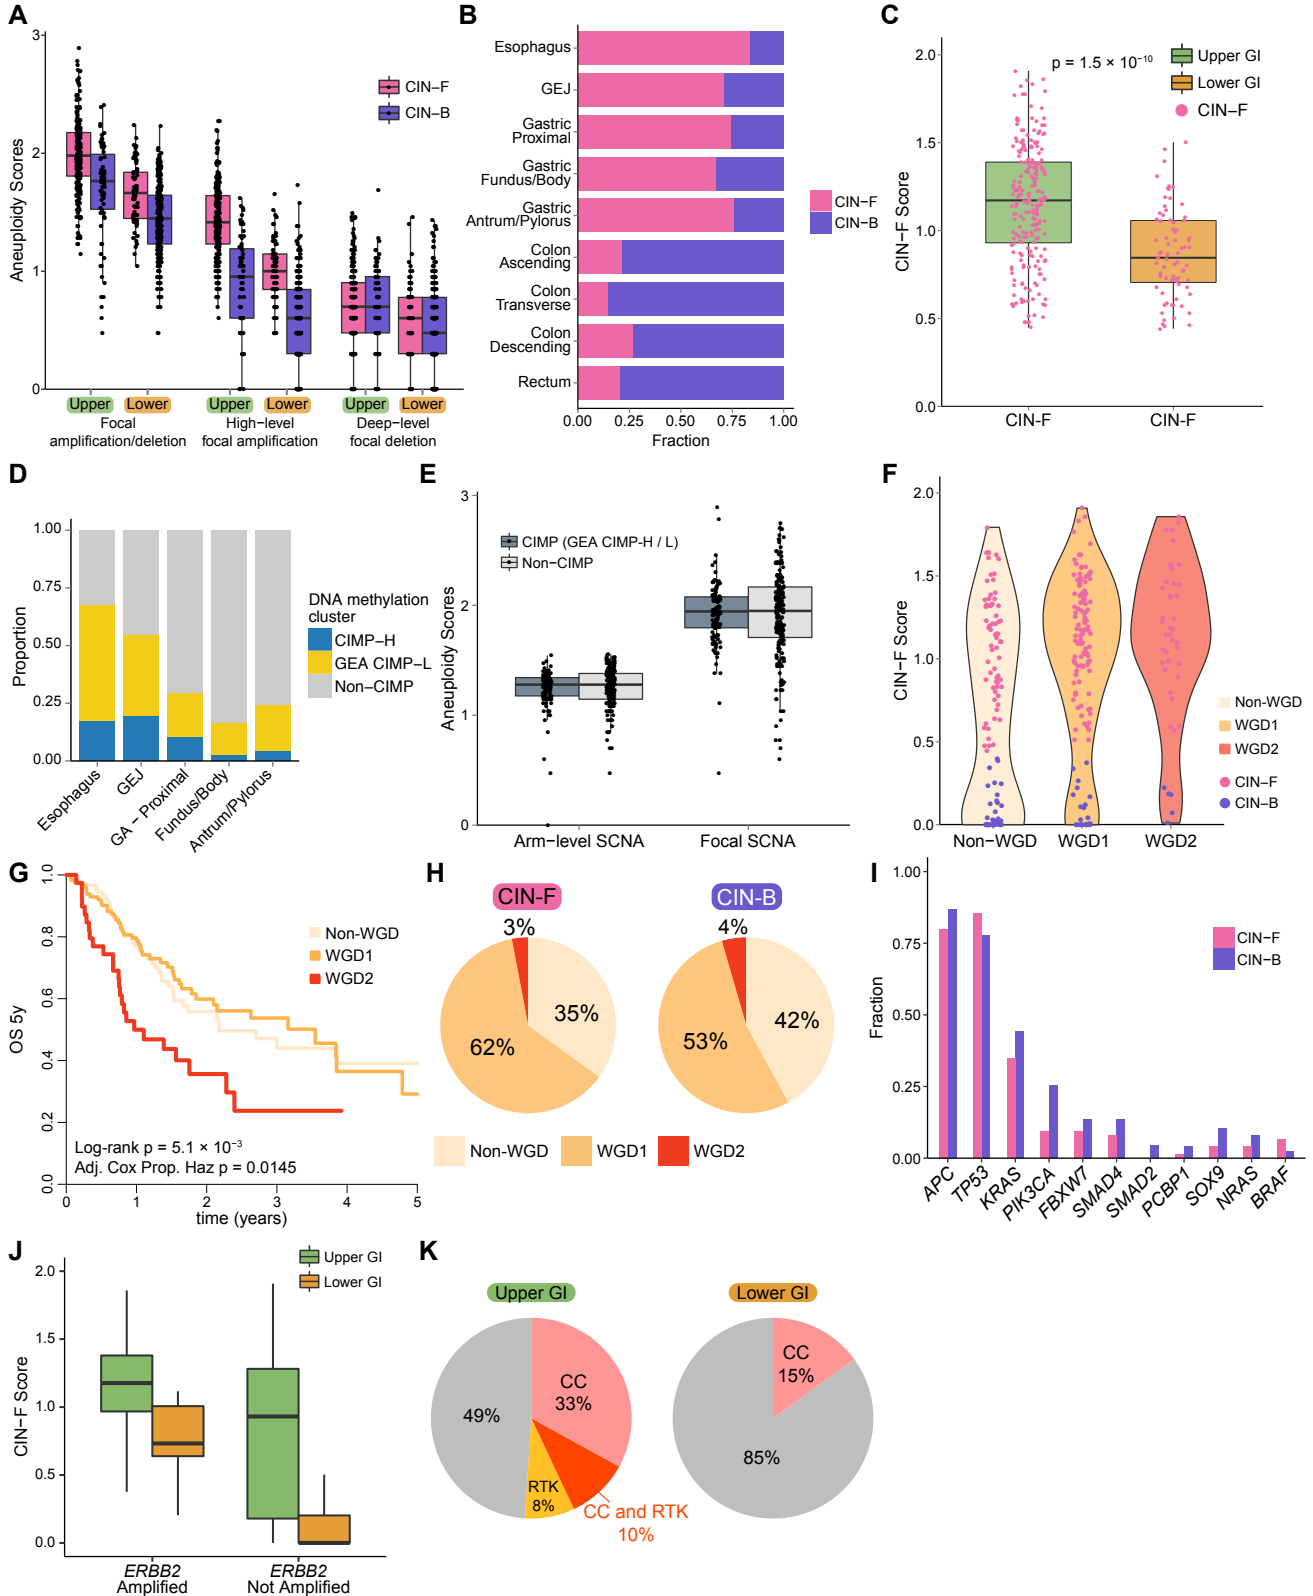



## Figure S4. Related to Figure 4.

### Molecular Features of CIN.

**(A)** Box plot showing aneuploidy scores for focal SCNA categories including general focal SCNA events (amplifications/deletions), high-level focal amplifications, and deep-level focal deletions in CIN-F and CIN-B tumors in the upper and lower GI tract (see methods for score details). Horizontal bars indicate median values, boxes represent interquartile range, and whiskers indicate values within 1.5 times interquartile range. **(B)** Proportion of CIN-F and CIN-B tumors across the anatomic gradient in GIAC CIN. **(C)** Distribution of CIN-F tumors in upper and lower GI tract. Horizontal bars indicate median values, boxes represent interquartile range, and whiskers indicate values within 1.5 times interquartile range. **(D)** Proportion of CIN GEA tumors stratified by CIMP-H, GEA CIMP-L, and non-CIMP status across the upper GI anatomic gradient. **(E)** Box plot showing aneuploidy scores (arm-level, and focal events) in upper GI CIN tumors stratified as CIMP-H/L and non-CIMP. Horizontal bars indicate median values, boxes represent interquartile range, and whiskers indicate values within 1.5 times interquartile range. **(F)** Distribution of CIN-F and CIN-B tumors in the upper GI tract stratified by whole genome doubling (WGD) status. **(G)** Kaplan-Meier curve indicating proportion of overall survival in patients with upper GI CIN tumors stratified by WGD status. **(H)** Proportion of WGD scored as Non-WGD, one WGD (WGD1), or more than one WGD (WGD2) in CIN-F and CIN-B tumors in the lower GI tract. **(I)** Frequency of somatic mutation in indicated genes between CIN-F and CIN-B tumors in the lower GI tract. **(J)** Box plot displaying CIN-F score in ERBB2-amplified and non-amplified CIN tumors in the upper and lower GI tract. Horizontal bars indicate median values, boxes represent interquartile range, and whiskers indicate values within 1.5 times interquartile range. **(K)** Distribution of co-amplified genomic events in ERBB2-amplified CIN tumors in the upper compared to lower GI tract. "RTK" indicates Receptor Tyrosine Kinase genes; "CC" indicates Cell Cycle regulator genes. Gray indicates the fraction of tumors with neither RTK, nor CC gene amplification among *ERBB2* amplified tumors.

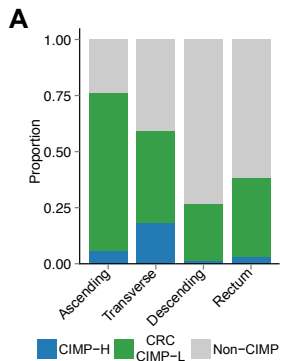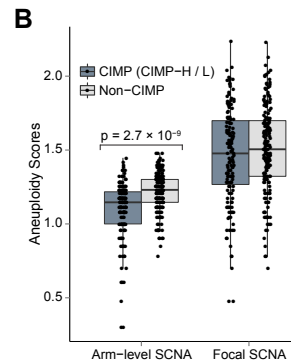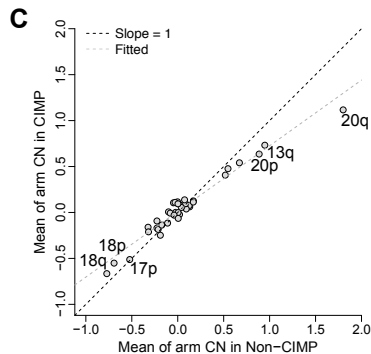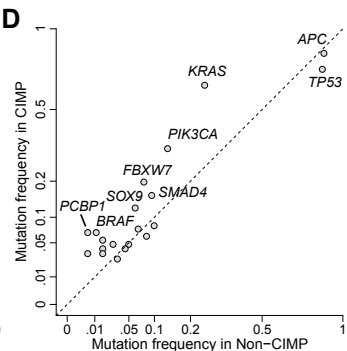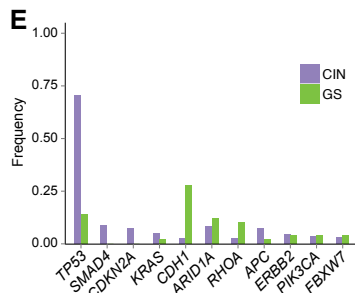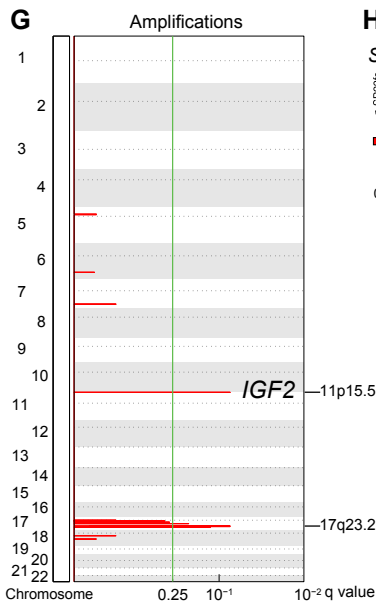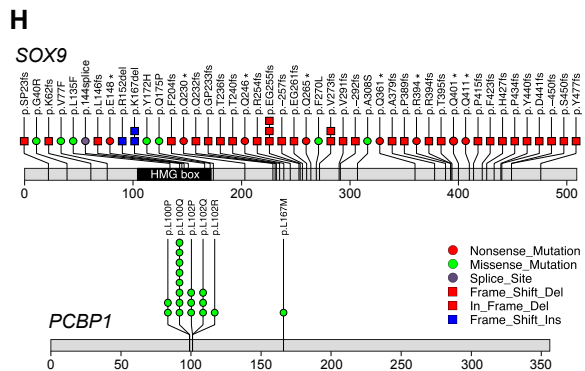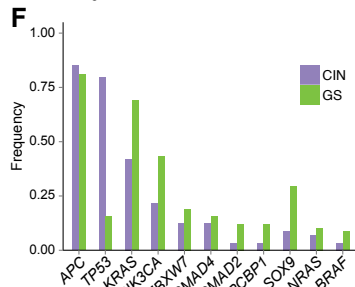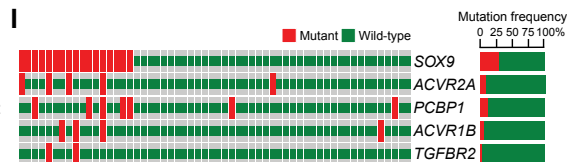

**Figure S5. Related to Figure 5.**

**Molecular Features of CIN and GS Colorectal Cancer.**

**(A)** Proportion of lower GI CIN tumors stratified by CIMP-H, CRC CIMP-L, and non-CIMP as represented by fraction per anatomic site. **(B)** Box plot showing aneuploidy scores (arm-level and focal events) in lower GI CIN tumors stratified by CIMP-H/L and non-CIMP. Horizontal bars indicate median values, boxes represent interquartile range, and whiskers indicate values within 1.5 times interquartile range. **(C)** Mean arm-level SCNA of indicated chromosome arms in CRC CIN tumors plotted by CIMP-H/L versus non-CIMP status. Distribution along the reference slope ( $y = x$ ; dotted-line) indicates equal mean arm-level SCNA in CIMP-H/L versus non-CIMP groups. **(D)** Frequency of indicated mutated genes in lower GI CIN tumors plotted by CIMP-H/L or non-CIMP status. Distribution along the reference slope ( $x/y = 1$ ; dotted-line) indicates equal mean arm-level SCNA in CIMP-H/L and non-CIMP groups. **(E)** Frequency of somatic mutations in indicated genes in upper GI tract stratified by CIN and GS molecular subtypes. **(F)** Frequency of somatic mutations in indicated genes in lower GI tract stratified by CIN and GS molecular subtypes. **(G)** GISTIC plot showing amplifications in lower GI GS, highlighting a peak at 11p15.5 containing a gene that encodes *IGF2*. **(H)** Schematic showing distribution of specific somatic mutations (subdivided into nonsense, missense, splice site, frameshift deletion, in-frame deletion, and frameshift insertion) along the *SOX9* and *PCBP1* gene locus in all lower GI tumors. **(I)** CoMut plot showing significant association between mutations in *SOX9* and indicated genes of the TGF $\beta$  pathway in lower GI GS tumors.

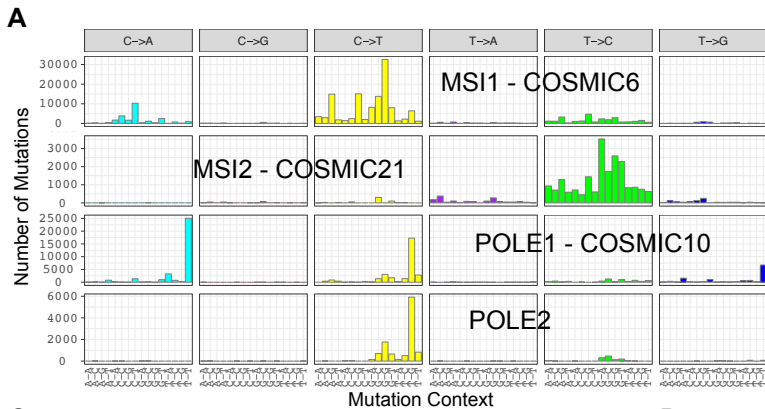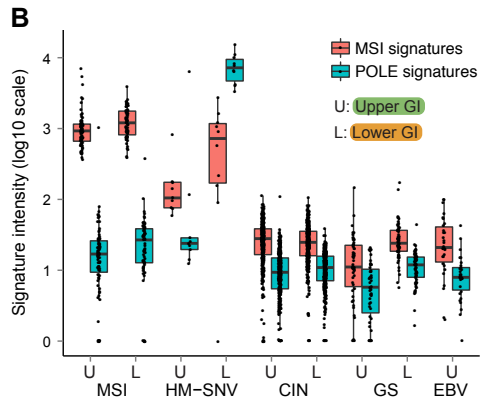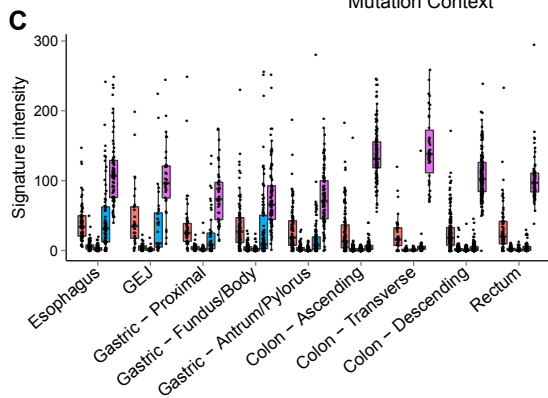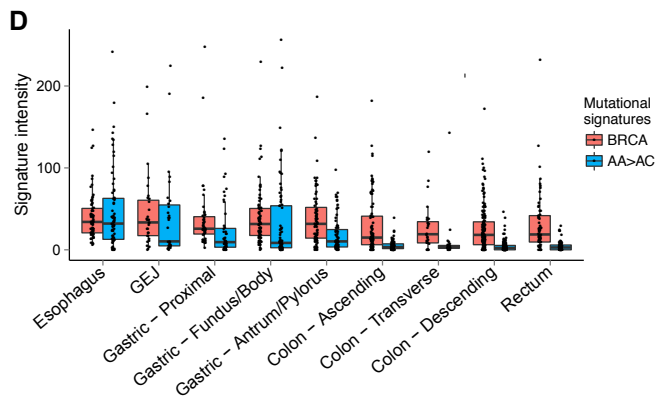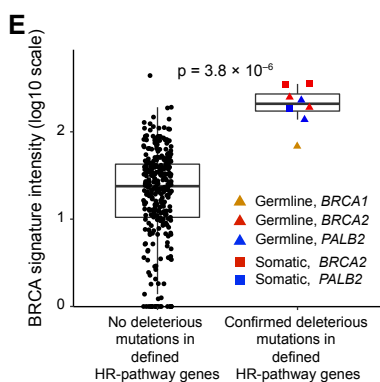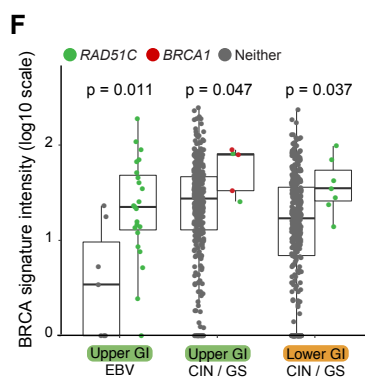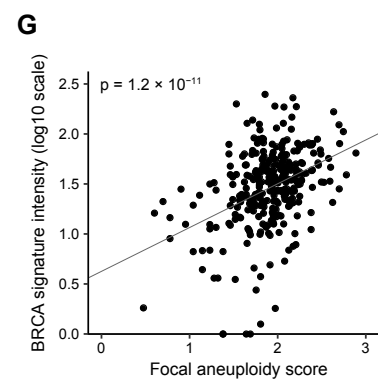

**Figure S6. Related to Figure 6.**

**Gastrointestinal Adenocarcinoma Mutational Signatures.**

**(A)** Significant enrichment of MSI-1, MSI-2, POLE-1, and POLE-2 COSMIC mutational signatures in GIAC displayed using the 96-substitution classification, which is defined by the substitution class and sequence context immediately 3' and 5' to the mutated base. **(B)** Box plot showing MSI and POLE mutational signature activity in GIAC molecular subtypes stratified by upper and lower GI tract. Horizontal bars indicate median values, boxes represent interquartile range, and whiskers indicate values within 1.5 times interquartile range. **(C)** BRCA, APOBEC1, APOBEC2, AA>AC, and CpG>TpG mutational signature activities in CIN and GS tumors across the anatomic gradient. Horizontal bars indicate median values, boxes represent interquartile range, and whiskers indicate values within 1.5 times interquartile range. **(D)** Box plot showing BRCA and AA>AC mutational signature activities in CIN tumors across the anatomic gradient. Horizontal bars indicate median values, boxes represent interquartile range, and whiskers indicate values within 1.5 times interquartile range. **(E)** Box plot showing BRCA signature intensity in relation to confirmed deleterious mutations in defined HR-pathway genes. Horizontal bars indicate median values, boxes represent interquartile range, and whiskers indicate values within 1.5 times interquartile range. **(F)** Box plot showing BRCA signature intensity in RAD51C and BRCA1 epigenetically silenced upper EBV, upper CIN/GS, and lower CIN/GS tumors. Horizontal bars indicate median values, boxes represent interquartile range, and whiskers indicate values within 1.5 times interquartile range. **(G)** Scatter plot displaying BRCA signature intensity plotted against focal aneuploidy score in upper GI CIN tumors.
